# Supplementary material
Source: publisher figshare collection journal article supplement (https://gsajournals.figshare.com/ndownloader/files/15090305)
Supplement: Supplementary file 1 [file 15090305]

**Table S2. Oligonucleotides used in this study**

| Designation | Sequence direction 5🡪3 | Features |
| --- | --- | --- |
| OSB285 | AGC TCG GTA CCC ATT TGT CCG TCG CTT GAG CAA AAT GTC | *Ncve-1* locus 5 |
| OSB286 | TTG AGG CGA ATT ATT TCC TAT CTC ATC CCA CTC ATG CC | *Ncve-1* locus 3 |
| OZG635 | ATG GGT GCT CAG GTT ATC GC | *Ncve-1* ORF 5 |
| OZG636 | TCA ATA CCC GCC AAT ATC TGC | *Ncve-1* ORF 3 |
| OZG637 | ATG CAA CCG TAC ACT TCA AAC C | *Ncve-2* ORF 5 |
| OZG638 | TTA ATA ATC ATC ATC ATC CTC ATT ATT C | *Ncve-2* ORF 3 |
| OZG639 | ATG TCA CCC GTC TAC GAA CTC | *Ncvos-1* ORF 5 |
| OZG640 | TCA CAT TGC CGA CCC AAA GTA AG | *Ncvos-1* ORF 3 |
| OZG641 | ATG CCT GCC TCT CAT ACC TTG | *Nclea-1* ORF 5 |
| OZG642 | TCA TGC TGG TCT TCT CGC C | *Nclea-1* ORF 3 |
| F00354 | ATT TCT ACT TGT ACA GTT CGT CCA TGC C | GFP 3 with stop |
| OZG891 | CCA TAC TCT CAC ATT TGC AAC AGA TAG CTC TAG GTC G | *Ncve-2* ORF 5 *Swa*I |
| OZG893 | CCA TAC TCT CAC ATT TCC CAC CTC ATC AGC TCT ACC | *Ncvos-1* ORF 5 *Swa*I |
| OZG908 | GGT GGT AGC GGT GGT ATG GTG AGC AAG | GFP 5 with linker |
| OZG1127 | CCA TAC TCT CAC ATT TAT GGG TGC TCA GGT TAT CGC | *Ncve-1* ORF 5 *Swa*I |
| OZG1128 | TAC CAC CGC TAC CAC CAT ACC CGC CAA TAT CTG CCT G | *Ncve-1* GFP fusion |
| OZG1129 | TAC CAC CGC TAC CAC CAT AAT CAT CAT CAT CCT CAT TAT TC | *Ncve-2* GFP fusion |
| OZG1130 | TAC CAC CGC TAC CAC CCA TTG CCG ACC CAA AGT AAG | *Ncvos-1* GFP fusion |
| OZG1131 | TAC CAC CGC TAC CAC CTG CTG GTC TTC TCG CCG TG | *Nclea-1* GFP fusion |
| AD_vel1_SpeI5 | CTC ACA TCA ACC AAA TCT AGA **act agt** ATG GGT GCT CAG GTT ATC GC | GFP fusion 5 |
| AD_vel1_PacI3 | CGC CCT TGC TCA CGA TG**t taa tta a**AT ACC CGC CAA TAT CTG CC | GFP fusion 3 |
| AD_vel2_BamHI5 | CAA CCA AAT CTA GAA CTA GT**g gat cc**A TGC AAC CGT ACA CTT CAA AC | GFP fusion 5 |
| AD_vel2_PacI3 | CGC CCT TGC TCA CGA TG**t taa tta a**AT AAT CAT CAT CAT CCT CAT | GFP fusion 3 |
| AD_vos1_SpeI5 | CAC ATC AAC CAA ATC TAG A**ac tag t**AT GGC AAC AGC ATC GCC GCC | GFP fusion 5 |
| AD_vos1_PacI3 | CGC CCT TGC TCA CGA TG**t taa tta a**CA TTG CCG ACC CAA AGT AAG | GFP fusion 3 |
| AD_lea1_SpeI5 | CAC ATC AAC CAA ATC TAG A**ac tag t**AT GCC TGC CTC TCA TAC CTT G | GFP fusion 5 |
| AD_lea1_PacI3 | CGC CCT TGC TCA CGA TG**t taa tta a**TG CTG GTC TTC TCG CCG TGA | GFP fusion 3 |
| AD_vel2endo_XhoI5f | TGG GCC CTC TAG ATG CAT G**ct cga g**GA CGC CCT AAA GGA AGT AAA C | GFP endo fusion 5 |
| AD_vel2UTR_BamHI5 | GTA TGC TAT ACG AAG TTA T**gg atc c**GA CCA AGC AAC ACA GAA GAA AC | GFP endo fusion 3 |
| AD_vel2UTR_SacI3 | ATG CAT CAA GCT TGG TAC C**ga gct c**GA AGG AAG CAT TGT TGA GAA G | GFP endo fusion 3 |
| AD_lea1endo_XhoI5 | TGG GCC CTC TAG ATG CAT G**ct cga g**AT GTT CCC TAT CGA TGA GGT G | GFP endo fusion 5 |
| AD_lea1_3UTR_SacI5 | CTA TAC GAA GTT ATG GAT CC**g agc tc**A GCC ACT TTG GTG GGT TCT G | GFP endo fusion 3 |
| AD_lea1_3UTR_SacI3 | ATG CAT CAA GCT TGG TAC C**ga gct c**TG CTG GCT AAG TCC CAT GAT | GFP endo fusion 3 |
| vel1 flank 5’F | GTA ACG CCA GGG TTT TCC CAG TCA CGA CGG GGT CGT CTG CAG ACT CCT TCG | Vel1 FORWARD 5 UTR |
| vel1 flank 5’R | CCTC CGC CTC CGC CTC CGC CGC CTC CGC CAT ACC CGC CAA TAT CTG CCT GC | Vel1 REVERSE 5 UTR |
| vel1 flank 3’F | TGC TAT ACG AAG TTA TGG ATC CGA GCT CGA CGG TTA TGT TCT TTG TGG GAT TTC TT | Vel1 FORWARD 3 UTR |
| vel1 flank 3’R | GCG GAT AAC AAT TTC ACA CAG GAA ACA GCC AGG CCA CTT CAC TAA CCG GTC C | Vel1 REVERSE 3 UTR |
| vel2 flank 5’F | GTA ACG CCA GGG TTT TCC CAG TAC AGA CGC TGT TGC GTT GTG TTT CGC | Vel2 FORWARD 5 UTR |
| vel2 flank 5’R | CCT CCG CCT CCG CCT CCG CCG CCT CCG CCA TAA TCA TCA TCA TCC TCA TTA TTC TTA CTA TTC G | Vel2 REVERSE 5 UTR |
| vel2 flank 3’F | TGC TAT ACG AAG TTA TGG ATC CGA GCT CGC TGT TGC GTT GTG TTT CGC | Vel2 FORWARD 3 UTR |
| vel2 flank 3’R | GCG GAT AAC AAT TTC ACA CAG GAA ACA GCG TTC AGT TCA GTG CAG TTT CAG C | Vel2 REVERSE 3 UTR |
| lae1 flank 5’F | GTA ACG CCA GGG TTT TCC CAG TAC AGA CGA TGG AAA ACG GAC GCT TCT ATG G | Lae1 FORWARD 5 UTR |
| lae1 flank 5’R | CCT CCG CCT CCG CCT CCG CCG CCT CCG CCT GCT GGT CTT CTC GCC G | Lae1 REVERSE 5 UTR |
| lae1 flank 3’F | TGC TAT ACG AAG TTA TGG ATC CGA GCT CGA GCC ACT TTG GTG GGT TCT G | Lae1 FORWARD 3 UTR |
| lae1flank 3’R | GCG GAT AAC AAT TTC ACA CAG GAA ACA GCC GTC TTG GAG ATG GAA GCT GC | Lae1 REVERSE 3 UTR |
| 5'UTR-ve-1-F | GTA ACG CCA GGG TTT TCC CAG TCA CGA CGG GAC GAC CGG ACG GGA GCT CAG | Tag VeA::FLAG FORWARD |
| 5'UTR-ve-1-R | GGT GGT GCT GCA AGT GTA GCC ATC CTG TTC ACC TCA CAA CCA | Tag VeA::FLAG REVERSE |
| VeA-F | ATG GCT ACA CTT GCA GCA CCA CCA CC | Tag VeA::FLAG FORWARD |
| VeA-R | CCT CCG CCT CCG CCT CCG CCG CCT CCG CCA CGC ATG GTG GCA GGC TTT GAG | Tag VeA::FLAG REVERSE |
| 3'UTR-vel1-F | TGC TAT ACG AAG TTA TGG ATC CGA GCT CGA CGG TTA TGT TCT TTG TGG GAT TTC TT | Tag VeA::FLAG FORWARD |
| 3'UTR-vel1-R | GCG GAT AAC AAT TTC ACA CAG GAA ACA GCC AGG CCA CTT CAC TAA CCG GTC C | Tag VeA::FLAG REVERSE |
| SpeI-veA-F | GAC TAC TAG TAT GGC TAC ACT TGC AGC ACC ACC ACC | Tag VeA::GFP FORWARD |
| XmaI-veA-R | AGT CCC CGG GAC GCA TGG TGG CAG GCT TTG | Tag VeA::GFP |
